# Supplementary material
Source: PubMed Central journal article supplement (PMC3379021)
Supplement: mmc1.pdf [file mmc1.pdf]

Supplementary for: *Tonotopic relationships  
reveal the charge density varies along the  
lateral wall of outer hair cells*

C. Corbitt, F. Farinelli, W.E. Brownell and B. Farrell

**S.1. Specific capacitance of lateral wall  $c_{LW}$  of OHCs is constant across the cochlea**

We write the experimentally derived logarithmic relationships between total voltage-dependent charge,  $Q_T$  and lateral wall capacitance  $C_{LW}$  and between  $Q_T$  and area of the lateral wall,  $A_{LW}$  where  $\alpha_1$ ,  $\alpha_2$ ,  $\beta_1$  and  $\beta_2$  are constants determined from fits of the data (see figure legend of Fig. 3) to

$$Q_T = \alpha_1 \ln(C_{LW}) + \beta_1 \quad (\text{S.1})$$

$$Q_T = \alpha_2 \ln(A_{LW}) + \beta_2. \quad (\text{S.2})$$

If  $C_{LW}$  is a linear function of  $A_{LW}$ , then the constants of Eq. (S.1) and Eq. (S.2) are related and we can write

$$\exp\left(\frac{-\beta_1}{\alpha_1}\right) = \exp\left(\frac{-\beta_2}{\alpha_2}\right) c_{LW}. \quad (\text{S.3})$$

Expressing in terms of  $\beta_1$

$$\beta_1 = \alpha_1 \frac{\beta_2}{\alpha_2} - \alpha_1 \ln(c_{LW}). \quad (\text{S.4})$$

Substituting Eq. (S.4) into Eq. (S.1) and expanding then

$$Q_T = \alpha_1 \ln(c_{LW}) + \alpha_1 \ln(A_{LW}) + \alpha_1 \frac{\beta_2}{\alpha_2} - \alpha_1 \ln(c_{LW}), \quad (\text{S.5})$$

and simplifying

$$Q_T = \alpha_1 \ln(A_{LW}) + \alpha_1 \frac{\beta_2}{\alpha_2}. \quad (\text{S.6})$$

We find  $\alpha_1=1.296$  pC and  $\alpha_2=1.3$  pC (see legend of Figure 3) therefore  $\alpha_1 = \alpha_2$  and Eq. (S.6) is equivalent to Eq. (S.2). We find  $\beta_1$  and  $\beta_2$  are -0.7010 and -6.689 pC from the relationships shown in Figure 3. We calculate  $\beta_1$  with Eq. (S.4) and  $c_{LW} = 0.01 \text{ pF}\mu\text{m}^{-2}$  and find it is -0.70012 pC which is the same as -0.7010 pC.

## S.2. Specific capacitance of basolateral region $c_B$ of OHCs is constant across the cochlea

We now show that  $c_b$  is  $\approx 0.006 \text{ pF}\mu\text{m}^{-2}$  and constant across the cochlea. We write Eq. (S.1) and Eq. (S.2) in a non-dimensional form

$$\frac{Q_T}{e} = \alpha_3 \ln\left(\frac{C_{LW}}{C_B}\right) + \beta_3 \quad (\text{S2.1})$$

$$\frac{Q_T}{e} = \alpha_4 \ln\left(\frac{A_{LW}}{A_B}\right) + \beta_4 \quad (\text{S2.2})$$

where  $e$  is the charge on an electron at  $1.609 \times 10^{-19} \text{ C}$ ;  $C_B$  and  $A_B$  the capacitance and area of the basolateral region and the constants  $\alpha_3$ ,  $\alpha_4$ ,  $\beta_3$  and  $\beta_4$  are now expressed in number of electrons. Once again the constants of Eq. (S2.1) and Eq.(S2.2) are related if  $c_{LW}$  and  $c_B$  are constant across the cochlea then  $\beta_3$  is written

$$\beta_3 = \alpha_3 \frac{\beta_4}{\alpha_4} + \alpha_3 \ln\left(\frac{c_B}{c_{LW}}\right). \quad (\text{S2.3})$$

Substituting Eq. (S2.3) into Eq. (S2.1), expanding and simplifying then

$$\frac{Q_T}{e} = \alpha_3 \ln\left(\frac{A_{LW}}{A_B}\right) + \alpha_3 \frac{\beta_4}{\alpha_4}. \quad (\text{S2.4})$$

We find  $\alpha_3 = 8.09 \times 10^6$  electrons and  $\alpha_4 = 8.12 \times 10^6$  electrons therefore  $\alpha_3 \approx \alpha_4$  and Eq. (S2.4) becomes Eq. (S2.2). We find  $\beta_3$  and  $\beta_4$  are  $3.924 \times 10^6$  electrons and  $7.591 \times 10^6$  electrons from fits of the data to Eq. (S2.1) and Eq. (S2.2). We calculate  $\beta_3$  with (S2.3) with  $c_{LW}$  and  $c_B = 0.01$  and  $0.0062 \text{ pF}\mu\text{m}^{-2}$  and find it is  $3.7 \times 10^6 \text{ pC}$  which is close to  $3.924 \times 10^6$  where an exact match is obtained if  $c_B = 0.00635 \text{ pF}\mu\text{m}^{-2}$ .

We now show that the unit of the constant  $\alpha$  is pC in relationships Eq. 8, Eq 12, Eq. (S.1) and Eq. (S.2). We write the non-dimensional expression Eq. (S2.2) as

$$\gamma = \alpha_4 \ln(a) + \beta_4 \quad (\text{S2.5})$$

where  $\gamma = Q_T/e$  and  $a = A_{LW}/A_B$ . We determine the derivative of  $\gamma$  with respect to  $a$

$$\frac{\partial \gamma}{\partial a} = \frac{\alpha_4}{a}. \quad (\text{S2.6})$$

Expand

$$\frac{\partial Q_T}{\partial A_{LW}} \frac{A_B}{e} = \alpha_4 \frac{A_B}{A_{LW}} \quad (\text{S2.7})$$

Simplify

$$\frac{\partial Q_T}{\partial A_{LW}} = \alpha_4 \frac{e}{A_{LW}} \quad (\text{S2.8})$$

We now do the same for Eq. (S.2) and take the derivative of  $Q_T$  with respect to  $A_{LW}$  then

$$\frac{\partial Q_T}{\partial A_{LW}} = \frac{\alpha_2}{A_{LW}} \quad (\text{S2.9})$$

This implies RHS of Eq. (S2.8) and Eq. (S2.9) are equivalent and  $\alpha_2 = \alpha_4 e$ . We find  $\alpha_2=1.3$  and  $\alpha_4= 8116883$  electrons =1.306 pC where we note that we experimentally determine  $\alpha_2$  to be 1.302 pC. Therefore  $\alpha_2$  and  $\alpha_1$  represent the number of electrons and in Eq. 8, Eq. 12, Eq. (S.1) and Eq. (S.2) exhibit units of pC.

### S.3. Determination of $\nu = \frac{ze\delta}{\kappa_B T}$ from the tonotopic relationships

The voltage-dependent capacitance when expressed as a function of the voltage is commonly described with the derivative of the two-state Boltzmann function

$$C_{NL} = \frac{\nu Q_T \exp(-\nu(V - V_{peak}))}{(1 + \exp(-\nu(V - V_{peak})))^2} \quad (\text{S3.1})$$

where  $\nu$  is

$$\nu = \frac{ze\delta}{\kappa_B T} \quad (\text{S3.2})$$

and  $z$  is valence of the charge,  $e$  is charge of the electron,  $\delta$  is the fraction of the distance travelled across the dielectric,  $\kappa_B$  is Boltzmann's constant and  $T$  is temperature. The peak capacitance,  $C_{peak}$  is the capacitance when  $V = V_{peak}$  and is calculated to be

$$C_{peak} = \frac{\nu Q_T}{(1 + 1)^2} = \frac{\nu}{4} Q_T. \quad (\text{S3.3})$$

We found the experimentally determined  $A_{LW}$  increased exponentially with  $C_{peak}$  specifically

$$C_{peak} = \alpha_5 \ln(A_{LW}) + \beta_5 \quad (\text{S3.4})$$

where  $\alpha_5$  and  $\beta_5$  are constants determined from the fits to the experimental data (see Figure 3 ). Equating Eq. (S3.3) into Eq. (S3.4) and rearranging

$$Q_T \approx \frac{4}{\nu} \alpha_5 \ln(A_{LW}) + \frac{4}{\nu} \beta_5 \quad (\text{S3.5})$$

The first term of the right hand side of (S3.5) should equate to first term on right-hand side of (S.2)

$$\alpha_2 = \frac{4}{\nu} \alpha_5 \quad (\text{S3.6})$$

substituting values

$$\nu = \frac{4\alpha_5}{\alpha_2} = \frac{9.04 \times 4}{1.3} \approx 27V^{-1}. \quad (\text{S3.7})$$

#### S.4. Prior experimental evidence that $C_{peak}$ is a non-linear function of the measured membrane area of OHC

There is evidence (see reference [10]) that the maximum non-linear capacitance varies non-linearly across the guinea pig cochlea. In Figure 2a of reference [10] the relationship between  $\frac{C_{peak}}{C_L}$  and the length of the OHC,  $l$  was described by a linear function although the constants of the relationship were not provided. We write the relationship with slope and intercept of  $\alpha$  and  $\beta$

$$\frac{C_{peak}}{C_L} = \alpha l + \beta \quad (S4.1)$$

where the linear capacitance,  $C_L$  was described in terms of  $l$  with

$$l = 2.9 \times C_L - 0.24. \quad (S4.2)$$

Substituting Eq. (S4.2) into Eq. (S4.1)

$$\frac{C_{peak}}{\frac{l+0.24}{2.9}} = \alpha l + \beta \quad (S4.3)$$

and expressing in terms of  $C_{peak}$  then

$$C_{peak} = \frac{l + 0.24}{2.9} \times (\alpha l + \beta). \quad (S4.4)$$

Expanding

$$C_{peak} = \frac{\alpha}{2.9} \frac{l^2}{1} + \frac{0.24}{2.9} [\alpha l + \frac{\beta l}{0.24}] + \frac{0.24}{2.9} \frac{\beta}{1}. \quad (S4.5)$$

If we write Eq. (S4.5) in terms of  $C_L$  where the constants  $\alpha_1 = \frac{1}{2.9}$  and  $\beta_1 = \frac{0.24}{2.9}$  then Eq. (S4.5) becomes

$$C_{peak} = \alpha \alpha_1 \times l^2 + [\beta_1 \alpha + \beta \alpha_1] \times l + \beta \beta_1. \quad (S4.5)$$

In terms of the measured area,  $A_m$  (Eq. 4 of main text) Eq. (S4.5) becomes

$$C_{peak} = \alpha \alpha_1 \times \frac{(A_m)^2}{(2\pi r)^2} + [\beta_1 \alpha + \beta \alpha_1] \times \frac{A_m}{2\pi r} + \beta \beta_1 \quad (S4.6)$$

and  $C_{peak}$  is a quadratic function of the OHC length and area, which is clearly non-linear.

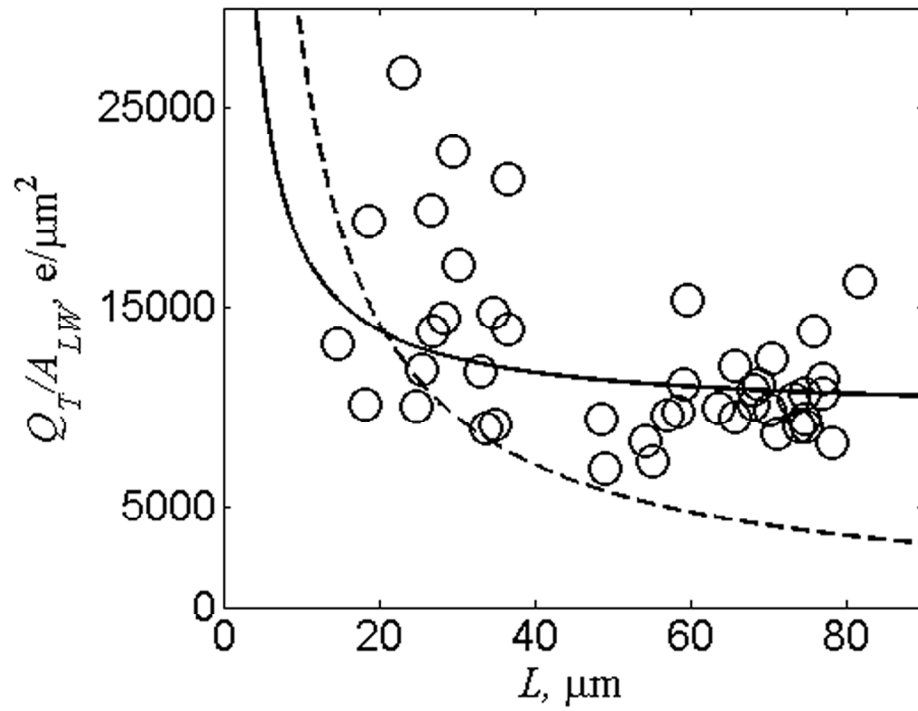

**Figure S.1.** Charge density calculated on a cell-by-cell basis assuming uniform distribution of charge in the lateral wall. The lines represent the reciprocal relationship for unconstrained (solid line,  $\alpha = 84,055 \text{ e}/\mu\text{m}$   $\beta = 9,625 \text{ e}/\mu\text{m}^2$ ,  $R^2 = 0.203$ ) and constrained fits (dashed line,  $\alpha = 284,305 \text{ e}/\mu\text{m}$ ). Similar weak fits are found for linear, log and exponential functions.

**Table S.1**

| <b>Parameter</b>                                                                                                                                | <b>Abbreviation</b>                                                |
|-------------------------------------------------------------------------------------------------------------------------------------------------|--------------------------------------------------------------------|
| Constants of the relationships                                                                                                                  | $\alpha, \beta$                                                    |
| Area: Membrane, Lateral wall, Non-lateral wall region, Basolateral region, Cuticular plate, Stereocilia bundle                                  | $A_M, A_{LW}, A_{NL}, A_B, A_{CP}, A_{SB}$                         |
| Capacitance: Total, Peak, Linear, Voltage-dependent, Non-lateral wall region, Basolateral region, Cuticular plate, Stereocilia bundle, Non-bell | $C_T, C_{peak}, C_L, C_{NL}, C_{NLW}, C_B, C_{CP}, C_{SB}, C_{NB}$ |
| Specific capacitance: Lateral wall, Basolateral region, Cuticular plate, Stereocilia bundle                                                     | $c_{LW}, c_B, c_{CP}, c_{SB}$                                      |
| Fraction of distance traveled across the dielectric                                                                                             | $\delta$                                                           |
| Charge of the electron                                                                                                                          | $e$                                                                |
| Frequency                                                                                                                                       | $f$                                                                |
| Force                                                                                                                                           | $F$                                                                |
| Boltzmann's constant                                                                                                                            | $\kappa_B$                                                         |
| Length: Total cell, Lateral wall                                                                                                                | $l, L$                                                             |
| Pressure                                                                                                                                        | $P$                                                                |
| Charge                                                                                                                                          | $q$                                                                |
| Maximum voltage-dependent charge                                                                                                                | $Q_T$                                                              |
| Resistance: Series, Membrane                                                                                                                    | $R_s, R_m$                                                         |
| Cell radius                                                                                                                                     | $r$                                                                |
| Peak density of lateral wall                                                                                                                    | $\rho_{LW}$                                                        |
| Charge density of lateral wall                                                                                                                  | $\sigma_{LW}$                                                      |
| Temperature                                                                                                                                     | $T$                                                                |
| Voltage                                                                                                                                         | $V$                                                                |
| Slope factor from fit to Boltzmann                                                                                                              | $v$                                                                |
| Valence of the charge                                                                                                                           | $z$                                                                |

**Table S.2:** Comparison of fitting different tonotopic relationships to the lateral wall data.

| Function                                    | $\alpha$         | $p$ -value | $\beta$         | $p$ -value | $R^2$ |
|---------------------------------------------|------------------|------------|-----------------|------------|-------|
| 1. $Q_T = (\alpha)\ln(A_{LW}) + \beta$      | 1.300 (0.145)    | <0.0001    | -6.689 (1.040)  | <0.0001    | 0.658 |
| $Q_T = (\alpha)(A_{LW}) + \beta$            | 0.001 (0.0001)   | <0.0001    | 1.017 (0.220)   | <0.0001    | 0.603 |
| $Q_T = (\alpha)(A_{LW})$                    | 0.0017 (0.00007) | <0.0001    |                 |            | 0.401 |
| 2. $Q_T = (\alpha)\ln(C_{LW}) + \beta$      | 1.296 (0.117)    | <0.0001    | -0.701(0.310)   | 0.029      | 0.744 |
| $Q_T = (\alpha)(C_{LW}) + \beta$            | 0.112 (0.011)    | <0.0001    | 0.949 (0.189)   | <0.0001    | 0.693 |
| $Q_T = (\alpha)(C_{LW})$                    | 0.1646 (0.006)   | <0.0001    |                 |            | 0.509 |
| 3. $C_{peak} = (\alpha)\ln(A_{LW}) + \beta$ | 9.04 (1.09)      | <0.0001    | -46.262 (7.867) | <0.0001    | 0.619 |
| $C_{peak} = (\alpha)(A_{LW}) + \beta$       | 0.008 (0.001)    | <0.0001    | 7.270 (1.632)   | <0.0001    | 0.575 |
| $C_{peak} = (\alpha)(A_{LW})$               | 0.0118 (0.0005)  | <0.0001    |                 |            | 0.375 |
| 4. $C_{peak} = (\alpha)\ln(C_{LW}) + \beta$ | 8.918 (0.934)    | <0.0001    | -4.352 (2.466)  | 0.085      | 0.684 |
| $C_{peak} = (\alpha)(C_{LW}) + \beta$       | 0.768 (0.090)    | <0.0001    | 7.022 (1.475)   | <0.0001    | 0.636 |
| $C_{peak} = (\alpha)(C_{LW})$               | 1.158 (0.04)     | <0.0001    |                 |            | 0.440 |

**Table S.3.** OHC parameters for adult male<sup>‡</sup>

| <b>Parameter</b>                          | <b>Values</b>  |
|-------------------------------------------|----------------|
| $c_{LW}$ , (pF/ $\mu\text{m}^2$ )         | 0.010 (0.0007) |
| $c_{LW}$ per cell, (pF/ $\mu\text{m}^2$ ) | 0.010 (0.0017) |
| $\sigma_{LW}$ , (pC/ $A_{LW}$ )           | 1.30 (0.15)    |
| $\rho_{LW}$ , (pF/ $A_{LW}$ )             | 9.04 (1.09)    |
| $A_B$ , ( $\mu\text{m}^2$ ) *             | 437 (70)       |
| $C_{NLW}$ , (pF)                          | 5.17 (0.64)    |
| Weight (grams)                            | 580 (45)       |
| Diameter of OHC ( $\mu\text{m}$ )         | 10.93 (1.77)   |

\*Values calculated from  $Q_T$  versus  $A_M$  (Table 1, function 4)

‡The numbers in parenthesis are the standard deviation of the estimates
